# Supplementary material for: Direct growth of mesoporous Sn-doped TiO2 thin films on conducting substrates for lithium-ion battery anodes
Source: Royal Society of Chemistry journal article supplement (doi:10.1039/c3ta13198j), 2013-01-01
Supplement: c3ta13198j.pdf [file c3ta13198j.pdf]

## Supporting Information

# Direct Growth of Mesoporous Sn-doped TiO<sub>2</sub> Thin Films on Conducting Substrates for Lithium-ion Battery Anodes

Yanli Wang, Ming Xu, Zheng Peng, and Gengfeng Zheng\*

Laboratory of Advanced Materials, Department of Chemistry, Fudan University, Shanghai,  
200433, People's Republic of China

\* Corresponding author: [gfzheng@fudan.edu.cn](mailto:gfzheng@fudan.edu.cn)

This file contains:

Methods, and Supporting Figures S1—S4, Table S1

## Methods

*Synthesis of the pristine TiO<sub>2</sub> and Sn-doped TiO<sub>2</sub> mesoporous thin films.* Ordered mesoporous TiO<sub>2</sub> films on Ti foil were synthesized via a spin-coating method on the basis of the ligand-assisted EISA process, followed by a two-step pyrolysis process. An acetylacetonate (AcAc)-coordinated Ti precursor (Ti(AcAc)) and a tri-block copolymer P123 (EO<sub>20</sub>PO<sub>70</sub>EO<sub>20</sub>, Mw = 5800, Sigma-Aldrich Co., USA) were used as the precursor and the template, respectively. For a typical synthesis, 0.075 g of P123 was first dissolved in 2.45 g of tetrahydrofuran (THF) to make a solution containing 3 wt% of the template. Meanwhile, another Ti(AcAc) solution was prepared by dissolving 0.30 g of titanium(IV) isopropoxide (Ti(OCH(CH<sub>3</sub>)<sub>2</sub>)<sub>4</sub>, TIPO, 98+%) in 0.45 g of AcAc. These two solutions were mixed and stirred at room temperature for 30 min. Then, 0.30 g of concentrated hydrochloric acid (36 wt%) was added into the mixed solution, which was stirred at room temperature for another 30 min. The solution was coated onto a Ti foil substrate at 500 rpm for 9 s to form a transparent thin film. The Ti foil with the thin film was placed horizontally on a glass plate at room temperature for 2 min and then transferred to a furnace to age at 40 °C for 24 h, followed by further aging at 100 °C for 24 h to form the as-deposited composite films. The as-deposited films were pyrolyzed at 500 °C for 3 h in nitrogen and then at 450 °C for 2 h in air, resulting in the pristine TiO<sub>2</sub> mesoporous thin film.

For the synthesis of Sn-doped TiO<sub>2</sub> mesoporous thin films, 2.25 g of SnCl<sub>2</sub>·2H<sub>2</sub>O was first mixed with 5.25 g of AcAc for 30 min to form the Sn(AcAc) precursor, which was subsequently added into the coating solution containing Ti(AcAc) and P123. A similar coating-calcination process was employed to obtain the Sn-doped TiO<sub>2</sub> film. The percentage of Sn doping was tuned

by the Sn/Ti ratio in the precursor solution, while the actual Sn/Ti atomic ratio in the final product was quantified by the inductively coupled plasma (ICP) measurement.

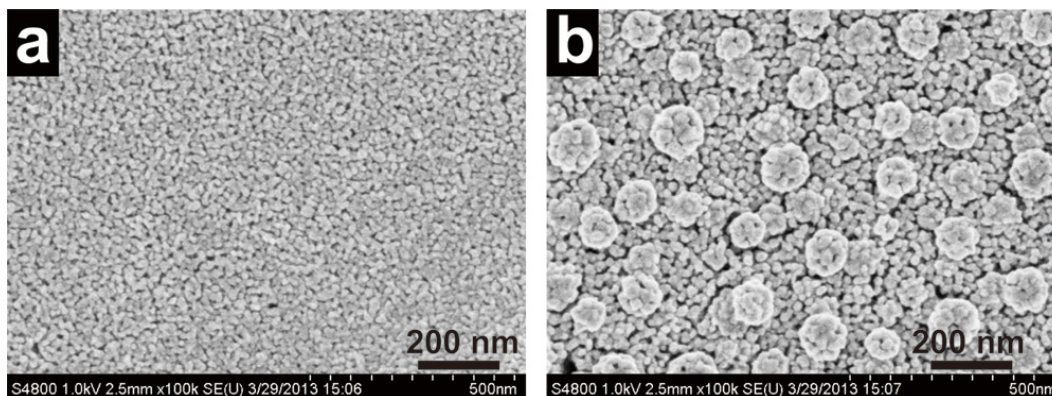

**Fig. S1.** SEM images of (a) the 15%-Sn-doped and (b) the 25%-Sn-doped mesoporous TiO<sub>2</sub> thin films.

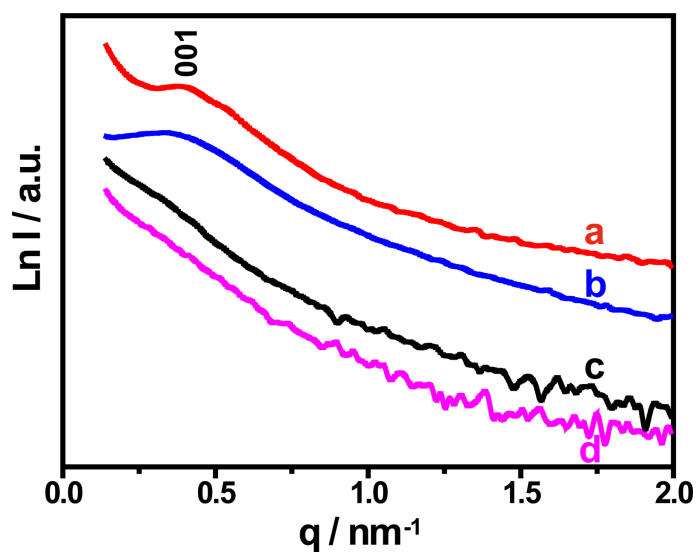

**Fig. S2.** Small-angle X-ray Scattering (SAXS) patterns of (a) pristine mesoporous TiO<sub>2</sub> films, (b) 6%-Sn-doped, (c) 15%-Sn-doped and (d) 25%-Sn-doped mesoporous TiO<sub>2</sub> thin films.

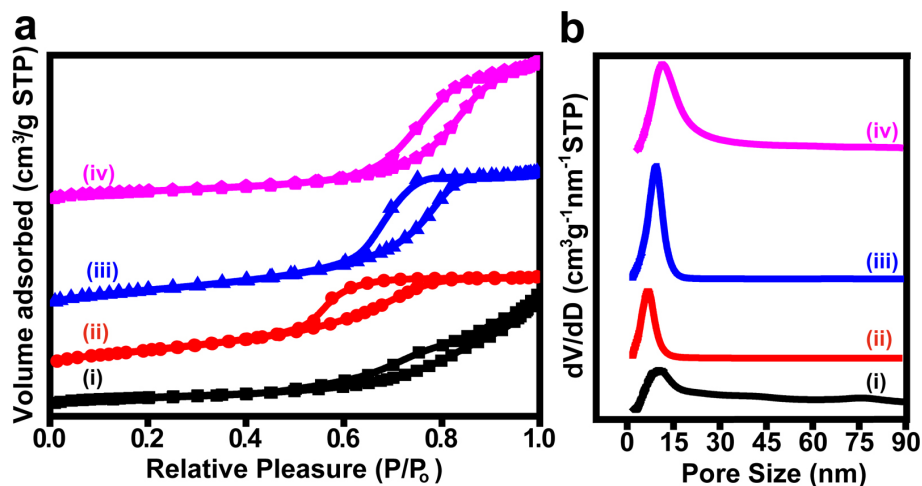

**Figure S3.** (a) N<sub>2</sub> adsorption-desorption isotherms of (i) pristine mesoporous TiO<sub>2</sub> films, (ii) 6%-Sn-doped, (iii) 15%-Sn-doped and (iv) 25%-Sn-doped mesoporous TiO<sub>2</sub> thin films. (b) Corresponding pore size distributions of the four samples in (a).

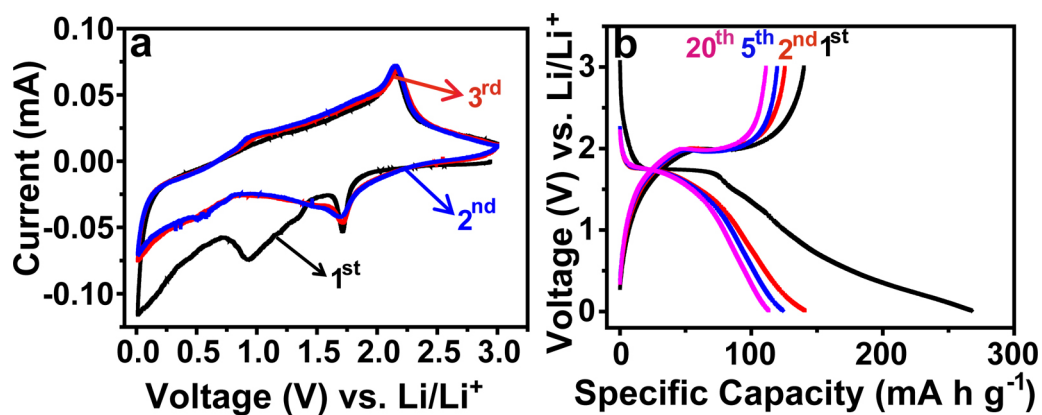

**Figure S4.** (a) Cyclic voltammograms of mesoporous TiO<sub>2</sub> films for the 1<sup>st</sup>, 2<sup>nd</sup>, and 3<sup>rd</sup> cycles. (b) Charge-discharge profiles of mesoporous TiO<sub>2</sub> films at a current rate of 84 mA g<sup>-1</sup> (0.5C based on TiO<sub>2</sub> theoretical capacity) for the 1<sup>st</sup>, 2<sup>nd</sup>, 5<sup>th</sup>, and 20<sup>th</sup> cycles.

**Table S1.** Surface area, pore volume and pore size data of the pristine mesoporous TiO<sub>2</sub> films, 6%-Sn-doped TiO<sub>2</sub> films, 15%-Sn-doped TiO<sub>2</sub> films and 25%-Sn-doped TiO<sub>2</sub> films.

|                                     | <b>Surface area (<math>S_{\text{BET}}</math>)<br/>m<sup>2</sup>/g</b> | <b>Pore Size<br/>nm</b> | <b>Pore volume (<math>V_{\text{total}}</math>)<br/>cm<sup>3</sup>/g</b> |
|-------------------------------------|-----------------------------------------------------------------------|-------------------------|-------------------------------------------------------------------------|
| <b>TiO<sub>2</sub></b>              | <b>68.19</b>                                                          | <b>9.60</b>             | <b>0.2031</b>                                                           |
| <b>6%-Sn-doped TiO<sub>2</sub></b>  | <b>93.43</b>                                                          | <b>5.81</b>             | <b>0.1376</b>                                                           |
| <b>15%-Sn-doped TiO<sub>2</sub></b> | <b>93.93</b>                                                          | <b>8.31</b>             | <b>0.1984</b>                                                           |
| <b>25%-Sn-doped TiO<sub>2</sub></b> | <b>71.24</b>                                                          | <b>11.28</b>            | <b>0.2027</b>                                                           |
